# Supplementary material for: Nutritional Importance of Selected Fresh Fishes, Shrimps and Mollusks to Meet Compliance with Nutritional Guidelines of n-3 LC-PUFA Intake in Spain
Source: PubMed Central journal article supplement (PMC7911951; doi:10.3390/nu13020465), 2021-01-30
Supplement: nutrients-13-00465-s001.pdf [file nutrients-13-00465-s001.pdf]

**Supplemental Table S1** Retention times of analyzed fatty acids

|                     | <b>Name</b>                                      | <b>Retention time<br/>(min)</b> |
|---------------------|--------------------------------------------------|---------------------------------|
| C12:0               | Lauric acid                                      | 16.02                           |
| C13:0               | Tridecanoic acid                                 | 17.54                           |
| C14:0               | Myristic acid                                    | 19.16                           |
| C14:1               | Myristoleic acid                                 | 20.64                           |
| C15:0               | Pentadecanoic acid                               | 20.82                           |
| C16:0               | Palmitic acid                                    | 22.46                           |
| C16:1n-7            | Palmitoleic acid                                 | 23.70                           |
| C17:0               | Heptadecanoic acid                               | 24.07                           |
| C17:1n-7            | cis 11-heptadecenoic acid                        | 25.28                           |
| C16:2n-4            | cis 9,12-hexadienoic acid                        | 25.40                           |
| C18:0               | Stearic acid                                     | 25.64                           |
| C18:1n-9            | Oleic acid                                       | 26.67                           |
| C18:1n-7            | Elaidic acid                                     | 26.85                           |
| <i>cis</i> C18:2n-6 | Linoleic acid                                    | 28.17                           |
| C20:0               | Araquidic acid                                   | 28.58                           |
| C18:3n-6            | Gamma-linolenic acid                             | 29.26                           |
| C20:1n-9            | Cis 11-eicoenoic acid                            | 29.53                           |
| C18:3n-3            | Linolenic acid                                   | 29.84                           |
| C20:2n-6            | cis 11,14-eicosadienoic acid                     | 30.94                           |
| C22:0               | Behenic acid                                     | 31.29                           |
| C20:3n-6            | cis 8,11,14-eicosatrienoic acid                  | 31.97                           |
| C22:1n-9            | Erucic acid                                      | 32.19                           |
| C20:3n-3            | cis 11,14,17-eicosatrienoic acid                 | 32.48                           |
| C20:4n-6            | Araquidonic acid                                 | 32.75                           |
| C22:2n-6            | cis 13,16-docosadienoic acid                     | 33.51                           |
| C20:5n-3            | cis 5,8,11,14,17-eicosapentadienoic acid (EPA)   | 34.40                           |
| C24:1n-9            | Nervonic acid                                    | 34.74                           |
| C22:5n-3            | cis 7,10,13,16,19-docosahexadienoic acid (DPA)   | 37.27                           |
| C22:6n-3            | cis 4,7,10,13,16,19-docosahexadienoic acid (DHA) | 38.09                           |

**Supplemental Table S2** Amount of fatty acid (mg) per gram of fresh fatty and medium fatty fishes usually consumed in Spain.

|                     | Fresh fatty fishes |                      |                     |                       |                     | Fresh medium fatty fishes |                       |                        |                 |
|---------------------|--------------------|----------------------|---------------------|-----------------------|---------------------|---------------------------|-----------------------|------------------------|-----------------|
|                     | Salmon<br>(n = 11) | Mackerel<br>(n = 11) | Sardine<br>(n = 11) | Gilt-head<br>(n = 11) | Anchovy<br>(n = 11) | Blue shark<br>(n = 11)    | Swordfish<br>(n = 11) | Red mullet<br>(n = 11) | Tuna<br>(n = 8) |
| C14:0               | 2.0 ± 0            | 5 ± 1                | 6 ± 1               | 2 ± 0                 | 3 ± 1               | <1                        | 1 ± 0                 | 1 ± 0                  | 1 ± 0           |
| C15:0               | <1                 | 1 ± 0                | <1                  | <1                    | 1 ± 0               | <1                        | <1                    | <1                     | <1              |
| C16:0               | 10 ± 1             | 32 ± 1               | 26 ± 1              | 15 ± 1                | 21 ± 2              | 8 ± 0                     | 7 ± 0                 | 11 ± 0                 | 10 ± 1          |
| C16:1n-7            | 2 ± 0              | 4 ± 0                | 5 ± 0               | 4 ± 0                 | 3 ± 0               | 1 ± 0                     | 1 ± 0                 | 2 ± 0                  | 1 ± 0           |
| C17:0               | <1                 | 1 ± 0                | <1                  | <1                    | 1 ± 0               | <1                        | <1                    | <1                     | <1              |
| C18:0               | 1 ± 0              | 9 ± 1                | 4 ± 0               | 3 ± 1                 | 3 ± 0               | 5 ± 0                     | 2 ± 0                 | 2 ± 0                  | 3 ± 0           |
| C18:1n-9            | 65 ± 2             | 14 ± 3               | 7 ± 1               | 16 ± 2                | 5 ± 0               | 6 ± 0                     | 20 ± 1                | 5 ± 0                  | 6 ± 1           |
| C18:1n-7            | 2 ± 0              | 3 ± 0                | 3 ± 0               | 2 ± 0                 | <1                  | 2 ± 0                     | 1 ± 0                 | <1                     | 1 ± 0           |
| <i>cis</i> C18:2n-6 | 11 ± 1             | 1 ± 0                | 1 ± 1               | 6 ± 1                 | 1 ± 0               | <1                        | <1                    | <1                     | <1              |
| C20:0               | <1                 | 1 ± 0                | <1                  | <1                    | <1                  | <1                        | <1                    | <1                     | <1              |
| C20:1n-9            | 4 ± 0              | 2 ± 1                | <1                  | <1                    | <1                  | 1 ± 0                     | 1 ± 0                 | <1                     | <1              |
| C18:3n-3            | 3 ± 0              | 1 ± 0                | <1                  | 1 ± 0                 | <1                  | <1                        | <1                    | <1                     | <1              |
| C20:2n-6            | 1 ± 0              | 1 ± 0                | 1 ± 0               | 1 ± 0                 | <1                  | <1                        | <1                    | <1                     | <1              |
| C20:4n-6            | <1                 | 1 ± 0                | 1 ± 0               | 2 ± 1                 | 1 ± 0               | 2 ± 0                     | <1                    | 1 ± 0                  | 1 ± 0           |
| C20:5n-3            | 2 ± 0              | 6 ± 1                | 5 ± 1               | 4 ± 1                 | 4 ± 1               | 2 ± 0                     | <1                    | 3 ± 0                  | 1 ± 0           |
| C24:1n-9            | <1                 | 1 ± 0                | <1                  | <1                    | <1                  | <1                        | <1                    | <1                     | <1              |
| C22:5n-3            | 1 ± 0              | 1 ± 0                | 1 ± 0               | 2 ± 0                 | <1                  | 2 ± 0                     | <1                    | 1 ± 0                  | <1              |
| C22:6n-3            | 3 ± 0              | 24 ± 3               | 6 ± 1               | 6 ± 1                 | 13 ± 2              | 9 ± 0                     | 3 ± 0                 | 5 ± 1                  | 4 ± 1           |
| SFA                 | 13 ± 1             | 48 ± 2               | 37 ± 2              | 20 ± 2                | 29 ± 2              | 14 ± 0                    | 9 ± 1                 | 15 ± 0                 | 14 ± 1          |
| MUFA                | 72 ± 2             | 24 ± 3               | 15 ± 1              | 23 ± 2                | 8 ± 1               | 11 ± 0                    | 24 ± 1                | 7 ± 1                  | 9 ± 1           |
| n-6 LC-PUFA         | 13 ± 1             | 4 ± 0                | 4 ± 1               | 9 ± 1                 | 1 ± 0               | 2 ± 0                     | 0 ± 0                 | 1 ± 0                  | 1 ± 0           |
| n-3 LC-PUFA         | 9 ± 1              | 32 ± 3               | 13 ± 2              | 12 ± 1                | 18 ± 2              | 13 ± 0                    | 4 ± 1                 | 10 ± 1                 | 6 ± 1           |
| n-3/n-6 PUFA        | 7 ± 1              | 80 ± 6               | 43 ± 8              | 15 ± 3                | 137 ± 18            | 57 ± 5                    | 175 ± 24              | 67 ± 4                 | 54 ± 5          |

---

|         |           |           |           |           |           |           |           |           |           |
|---------|-----------|-----------|-----------|-----------|-----------|-----------|-----------|-----------|-----------|
| EPA/DHA | 0.7 ± 0.0 | 0.3 ± 0.1 | 8.2 ± 1.0 | 8.0 ± 1.3 | 0.5 ± 0.1 | 2.4 ± 0.2 | 0.1 ± 0.1 | 6.9 ± 0.7 | 4.0 ± 1.9 |
|---------|-----------|-----------|-----------|-----------|-----------|-----------|-----------|-----------|-----------|

---

Data are presented in mg/g of fish, as the mean ± SEM. To calculate mg/g fatty and medium fatty fish, we multiply the percentage of each individual fatty acid by the amount of total fat described in BEDCA [17] and USDA (for the blue shark) [18] and by the suggested correction factor: 0.9 [21]. Then data were expressed as mg/g fish. DHA, docosahexaenoic acid; EPA, eicosapentaenoic acid; MUFA, monounsaturated fatty acid; n-3 LC-PUFA, n-3 long chain polyunsaturated fatty acid; n-6 LC-PUFA, n-6 long chain polyunsaturated fatty acid; SFA, saturated fatty acids.

**Supplemental Table S3** Amount of fatty acid (mg) per gram of fresh white fishes usually consumed in Spain.

|                     | Scad<br>(n = 11) | Megrim<br>(n = 11) | Hake<br>(n = 11) | Perch<br>(n = 11) | European<br>seabass<br>(n = 11) | Common<br>Sole<br>(n = 11) | Pangasius<br>(n = 11) | Codfish<br>(n = 11) | European<br>hake<br>(n = 11) | Blue<br>whiting<br>(n = 11) | Anglerfish<br>(n = 11) |
|---------------------|------------------|--------------------|------------------|-------------------|---------------------------------|----------------------------|-----------------------|---------------------|------------------------------|-----------------------------|------------------------|
| C14:0               | 1 ± 0            | 1 ± 0              | <1               | <1                | <1                              | <1                         | <1                    | <1                  | <1                           | <1                          | <1                     |
| C16:0               | 4 ± 0            | 4 ± 0              | 3 ± 0            | 3 ± 0             | 2 ± 0                           | 3 ± 0                      | 2 ± 0                 | 2 ± 0               | 1 ± 0                        | 1 ± 0                       | 1 ± 0                  |
| C16:1n-7            | 1 ± 0            | 1 ± 0              | 1 ± 0            | 1 ± 0             | <1                              | <1                         | <1                    | <1                  | <1                           | <1                          | <1                     |
| C18:0               | 1 ± 0            | 1 ± 0              | <1               | 1 ± 0             | <1                              | 1 ± 0                      | 2 ± 0                 | <1                  | <1                           | <1                          | <1                     |
| C18:1n-9            | 3 ± 0            | 2 ± 0              | 4 ± 1            | 2 ± 0             | 3 ± 0                           | 1 ± 0                      | 3 ± 0                 | 1 ± 0               | 1 ± 0                        | 1 ± 0                       | 1 ± 0                  |
| <i>cis</i> C18:2n-6 | <1               | <1                 | <1               | <1                | 1 ± 0                           | <1                         | 1 ± 0                 | <1                  | <1                           | <1                          | <1                     |
| C20:1n-9            | <1               | <1                 | 1 ± 0            | <1                | <1                              | <1                         | <1                    | <1                  | <1                           | <1                          | <1                     |
| C20:5n-3            | 1 ± 0            | 1 ± 0              | 1 ± 0            | <1                | 1 ± 0                           | 1 ± 0                      | <1                    | 1 ± 0               | <1                           | <1                          | <1                     |
| C22:6n-3            | 2 ± 0            | 3 ± 0              | 2 ± 0            | 2 ± 0             | 1 ± 0                           | 2 ± 0                      | <1                    | 2 ± 0               | 2 ± 0                        | 2 ± 0                       | 1 ± 0                  |
| SFA                 | 6 ± 0            | 5 ± 0              | 4 ± 0            | 5 ± 0             | 2 ± 0                           | 4 ± 0                      | 4 ± 0                 | 2 ± 0               | 2 ± 0                        | 2 ± 0                       | 1 ± 0                  |
| MUFA                | 4 ± 0            | 3 ± 0              | 5 ± 1            | 3 ± 0             | 4 ± 0                           | 2 ± 0                      | 3 ± 0                 | 1 ± 0               | 1 ± 0                        | 1 ± 0                       | 1 ± 0                  |
| n-6 LC-PUFA         | <1               | 1 ± 0              | <1               | 1 ± 0             | 1 ± 0                           | 1 ± 0                      | 1 ± 0                 | <1                  | <1                           | 0 ± 0                       | <1                     |
| n-3 LC-PUFA         | 3 ± 1            | 5 ± 0              | 3 ± 0            | 3 ± 0             | 1 ± 0                           | 3 ± 0                      | <1                    | 4 ± 0               | 3 ± 0                        | 2 ± 0                       | 2 ± 0                  |
| n-3/n-6 PUFA        | 100 ± 11         | 94 ± 5             | 74 ± 7           | 47 ± 4            | 11 ± 2                          | 49 ± 3                     | 2 ± 0                 | 142 ± 9             | 111 ± 3                      | 101 ± 4                     | 45 ± 2                 |
| EPA/DHA             | 3.1 ± 0.3        | 3.5 ± 0.5          | 3.4 ± 0.3        | 1.9 ± 0.1         | 10.5 ± 2.4                      | 3.6 ± 0.3                  | 2.4 ± 0.5             | 6.4 ± 0.4           | 2.1 ± 0.1                    | 3.1 ± 0.2                   | 2.2 ± 0.1              |

Data are presented in mg/g of fish, as the mean ± SEM. To calculate mg/g lean fish, we multiplied the percentage of each individual fatty acid by the amount of total fat described in BEDCA [17] and by the suggested correction factor: 0.7 [21]. Then data were expressed as mg/g fish. DHA, docosahexaenoic acid; EPA, eicosapentaenoic acid; MUFA, monounsaturated fatty acid; n-3 LC-PUFA, n-3 long chain polyunsaturated fatty acid; n-6 LC-PUFA, n-6 long chain polyunsaturated fatty acid; SFA, saturated fatty acids.

**Supplemental Table S4** Amount of fatty acid (mg) per gram of fresh mollusks and crustaceans usually consumed in Spain.

|              | <b>Shrimp</b><br>(n = 11) | <b>Mussel</b><br>(n = 10) | <b>Clam</b><br>(n = 11) | <b>Squid</b><br>(n = 11) | <b>Cuttlefish</b><br>(n = 11) |
|--------------|---------------------------|---------------------------|-------------------------|--------------------------|-------------------------------|
| C14:0        | 1 ± 0                     | <1                        | <1                      | <1                       | <1                            |
| C16:0        | 2 ± 0                     | 4 ± 0                     | 4 ± 0                   | 3 ± 0                    | 2 ± 0                         |
| C16:1n-7     | <1                        | 1 ± 0                     | 1 ± 0                   | <1                       | <1                            |
| C18:0        | 1 ± 0                     | 1 ± 0                     | 1 ± 0                   | <1                       | 1 ± 0                         |
| C18:1n-9     | 2 ± 0                     | <1                        | <1                      | <1                       | <1                            |
| C18:1n-7     | 1 ± 0                     | <1                        | <1                      | <1                       | <1                            |
| C20:4n-6     | 1 ± 0                     | <1                        | <1                      | <1                       | <1                            |
| C20:5n-3     | 2 ± 0                     | 2 ± 0                     | 1 ± 0                   | 1 ± 0                    | 1 ± 0                         |
| C22:6n-3     | 2 ± 0                     | 2 ± 0                     | 2 ± 0                   | 4 ± 0                    | 2 ± 0                         |
| SFA          | 4 ± 0                     | 5 ± 0                     | 5 ± 0                   | 4 ± 0                    | 2 ± 0                         |
| MUFA         | 3 ± 0                     | 2 ± 0                     | 1 ± 0                   | 1 ± 0                    | 1 ± 0                         |
| n-6 LC-PUFA  | 1 ± 0                     | 1 ± 0                     | 1 ± 0                   | <1                       | 1 ± 0                         |
| n-3 LC-PUFA  | 5 ± 0                     | 5 ± 0                     | 4 ± 0                   | 6 ± 0                    | 3 ± 0                         |
| n-3/n-6 PUFA | 46 ± 2                    | 49 ± 2                    | 61 ± 4                  | 411 ± 27                 | 62 ± 8                        |
| EPA/DHA      | 7.7 ± 0.2                 | 13.5 ± 1.1                | 7.0 ± 0.5               | 3.0 ± 0.1                | 6.8 ± 0.4                     |

Data are presented in mg/g of fish, as the mean ± SEM. To calculate mg/g mollusk and crustaceans, we multiply the percentage of each individual fatty acid by the amount of total fat described in BEDCA [17] and by the suggested correction factor: 0.7 [21]. Then data were expressed as mg/g mollusk and crustaceans. DHA, docosahexaenoic acid; EPA, eicosapentaenoic acid; MUFA, monounsaturated fatty acid; n-3 LC-PUFA, n-3 long chain polyunsaturated fatty acid; n-6 LC-PUFA, n-6 long chain polyunsaturated fatty acid; SFA, saturated fatty acids.
